# Supplementary material for: The Effects of NAA on the Tuberous Root Yield and Quality of Rehmannia glutinosa and Its Regulatory Mechanism by Transcriptome and Metabolome Profiling
Source: MDPI journal article supplement (doi:10.3390/cimb44080227), 2022-07-22
Supplement: s1 [file s1]

**Figure S1.** Metabolomics analysis of *R. glutinosa* NTs and CGs. (a) PCA score plots for all samples. (b) PLS-DA score plots for all samples. (c) OPLS-DA score plots for all samples. (d) Heatmap clustering of 29 DAMs. There are six biological repeats in each group.

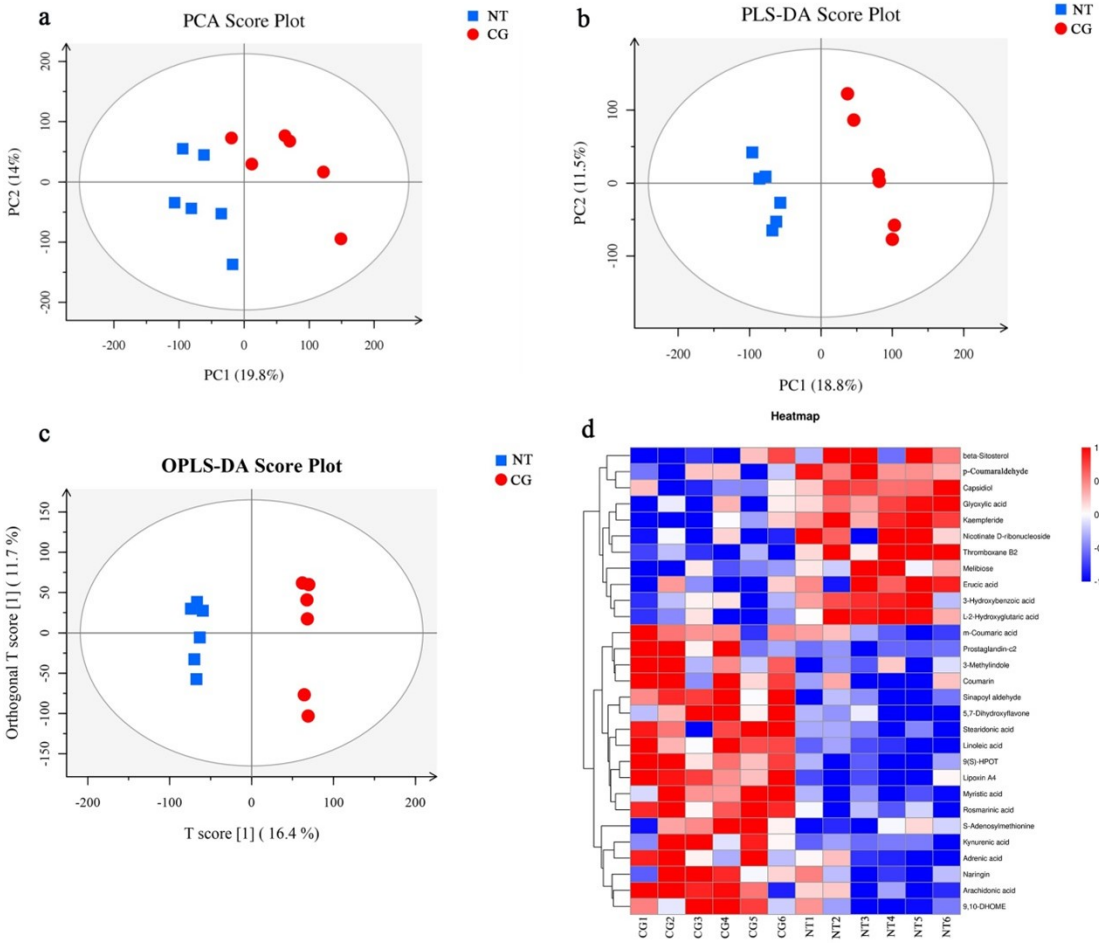

**Figure S2** Statistical histogram of DAMs identified by primary mass spectrometry

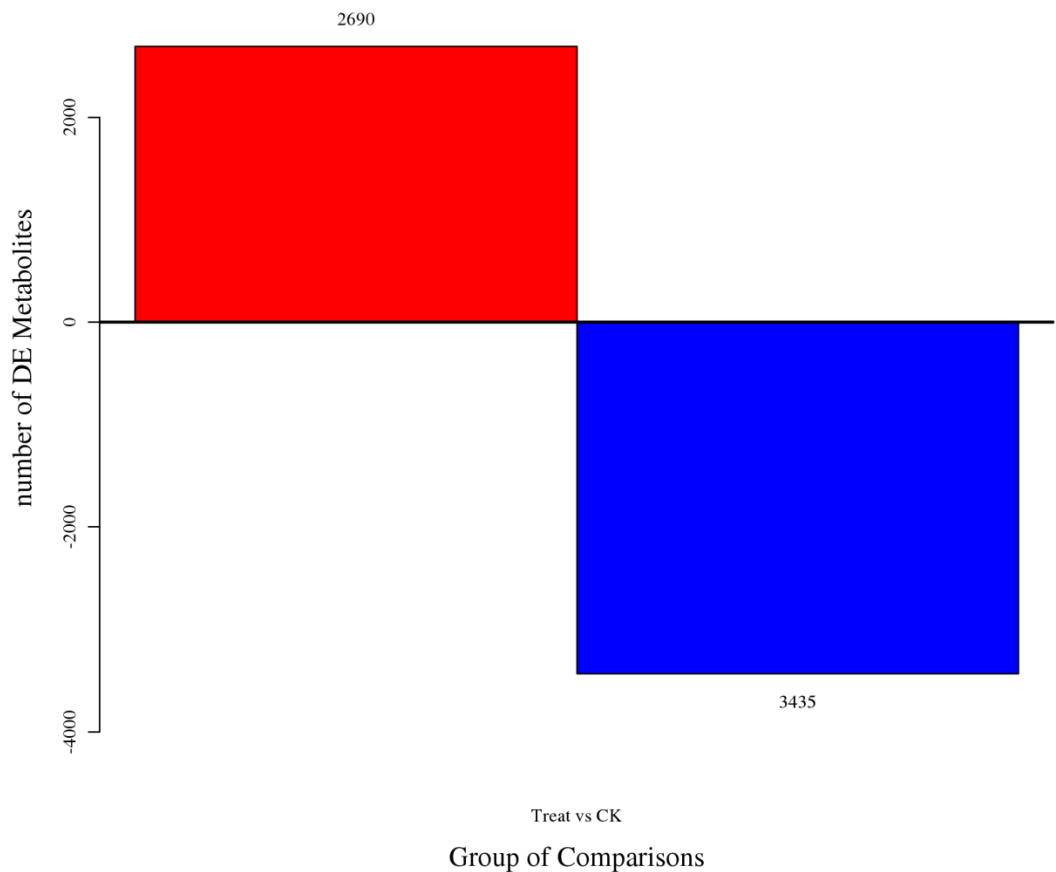

**Figure S3.** Histogram of several DAMs identified by secondary mass spectrometry

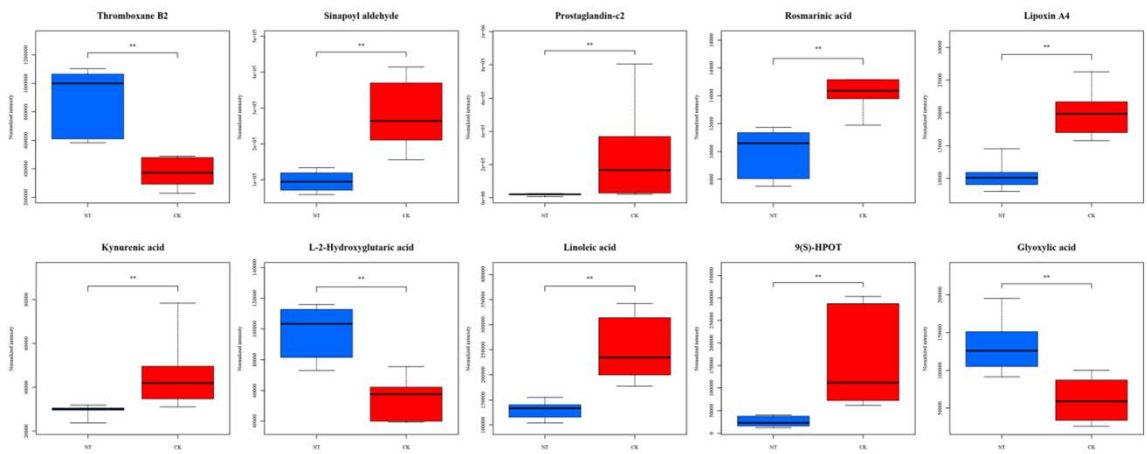

**Figure S4.** The number of the metabolites in every class

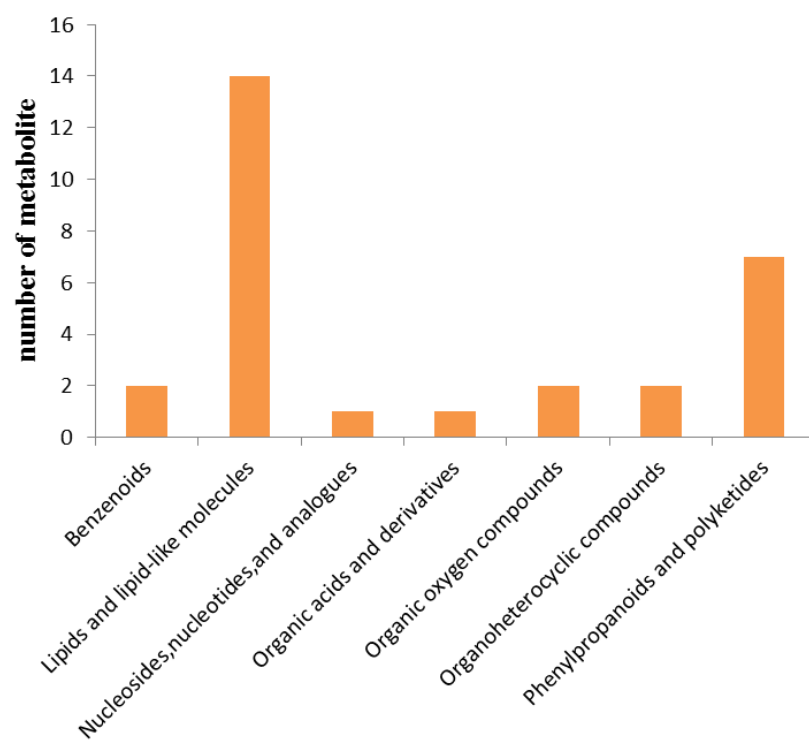

Figure S5. DEGs volcano plot

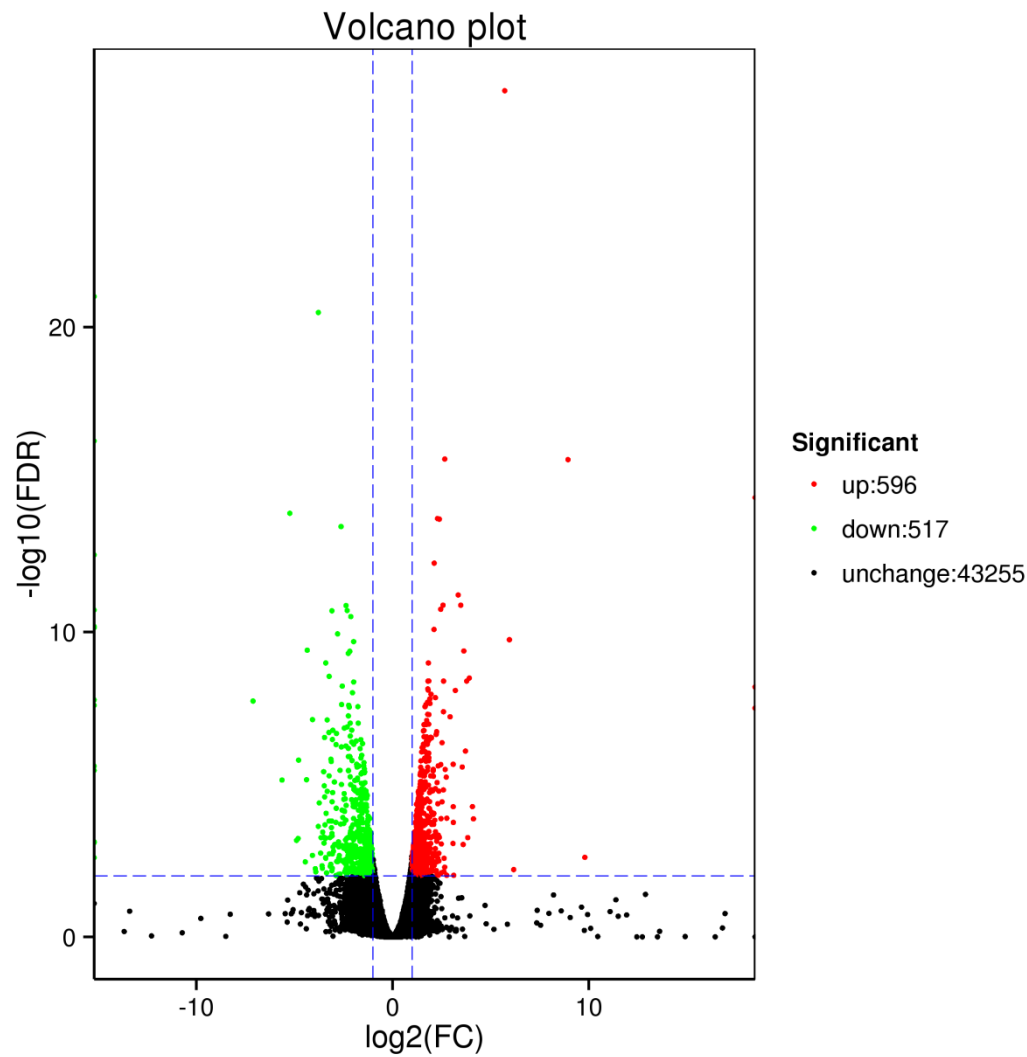

Figure S6. GO annotation analysis of DEGs

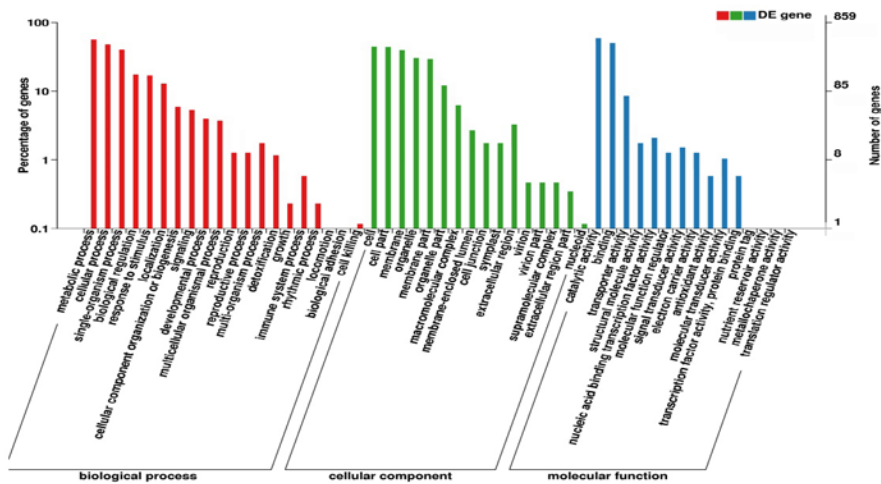

**Figure S7.** KEGG annotation analysis of DEGs based on enlarged lowest Q-value

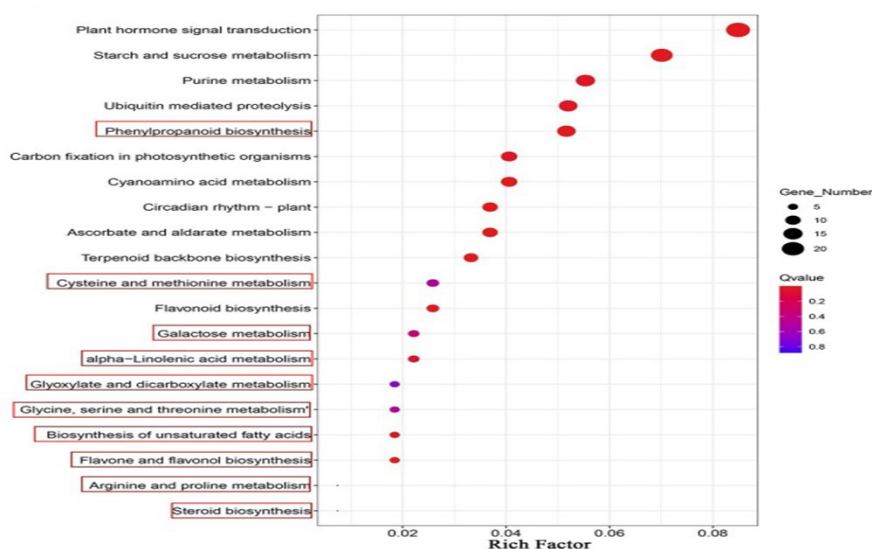

**Table S1.** NAA-treated *R. glutinosa* and untreated yield.

| sample | Yield of 1 mu (kg) | Equivalent yield (kg/hm <sup>2</sup> ) | Yield increase/% |
|--------|--------------------|----------------------------------------|------------------|
| CK     | 2345.17            | 35017.50                               |                  |
| NT     | 2651.17            | 39569.78                               | 13               |

**TableS2.** List of 29 DAMs identified by secondary mass spectrometry

| name                     | mz     | rt      | ppm   | KEGG   | FC    | log2(FC) | p.value | FDR   | regulation | pos-neg |
|--------------------------|--------|---------|-------|--------|-------|----------|---------|-------|------------|---------|
| p-Coumaraldehyde         | 149.06 | 656.69  | 1.87  | C05608 | 1.874 | 0.906    | 0.005   | 0.178 | up         | pos     |
| 3-Hydroxybenzoic acid    | 137.06 | 106.25  | 14.26 | C00587 | 2.456 | 1.296    | 0.020   | 0.223 | up         | neg     |
| 3-Methylindole           | 132.08 | 284.58  | 6.94  | C08313 | 0.308 | -1.698   | 0.031   | 0.231 | down       | pos     |
| 5,7-Dihydroxyflavone     | 255.06 | 545.86  | 3.78  | C10028 | 0.378 | -1.403   | 0.008   | 0.178 | down       | pos     |
| 9(S)-HPOT                | 293.21 | 806.17  | 1.17  | C16321 | 0.158 | -2.659   | 0.005   | 0.178 | down       | pos     |
| 9,10-DHOME               | 313.24 | 465.77  | 5.29  | C14828 | 0.392 | -1.350   | 0.013   | 0.202 | down       | neg     |
| Adrenic acid             | 331.26 | 558.61  | 14.15 | C16527 | 0.649 | -0.623   | 0.045   | 0.286 | down       | neg     |
| Arachidonic acid         | 303.24 | 901.98  | 14.73 | C00219 | 0.078 | -3.689   | 0.031   | 0.248 | down       | neg     |
| beta-Sitosterol          | 397.39 | 668.82  | 6.86  | C01753 | 1.977 | 0.983    | 0.045   | 0.264 | up         | pos     |
| Capsidiol                | 219.17 | 980.66  | 0.01  | C09627 | 1.612 | 0.689    | 0.008   | 0.178 | up         | pos     |
| Coumarin                 | 147.04 | 369.17  | 3.58  | C05851 | 0.474 | -1.077   | 0.045   | 0.264 | down       | pos     |
| Erucic acid              | 338.34 | 1059.15 | 1.55  | C08316 | 1.760 | 0.816    | 0.020   | 0.206 | up         | pos     |
| Glyoxylic acid           | 74.10  | 323.07  | 11.27 | C00048 | 2.172 | 1.119    | 0.008   | 0.178 | up         | pos     |
| Kaempferide              | 301.08 | 681.16  | 11.26 | C10098 | 1.610 | 0.687    | 0.005   | 0.178 | up         | pos     |
| Kynurenic acid           | 190.09 | 435.02  | 2.74  | C01717 | 0.635 | -0.656   | 0.008   | 0.178 | down       | pos     |
| L-2-Hydroxyglutaric acid | 149.04 | 901.79  | 3.57  | C03196 | 1.774 | 0.827    | 0.008   | 0.178 | up         | pos     |
| Linoleic acid            | 281.25 | 805.04  | 2.81  | C01595 | 0.520 | -0.943   | 0.005   | 0.178 | down       | pos     |
| Lipoxin A4               | 351.22 | 822.79  | 5.96  | C06314 | 0.521 | -0.940   | 0.005   | 0.202 | down       | neg     |
| m-Coumaric acid          | 165.05 | 484.09  | 0.86  | C12621 | 0.568 | -0.816   | 0.045   | 0.264 | down       | pos     |

|                             |        |        |       |        |       |        |       |            |     |
|-----------------------------|--------|--------|-------|--------|-------|--------|-------|------------|-----|
| Melibiose                   | 343.14 | 93.76  | 8.00  | C05400 | 2.048 | 1.034  | 0.013 | 0.184 up   | pos |
| Myristic acid               | 228.21 | 557.86 | 3.29  | C06424 | 0.206 | -2.278 | 0.005 | 0.178 down | pos |
| Naringin                    | 581.18 | 438.18 | 9.58  | C09789 | 0.425 | -1.235 | 0.045 | 0.264 down | pos |
| Nicotinate D-ribonucleoside | 256.08 | 87.25  | 0.36  | C05841 | 2.019 | 1.013  | 0.045 | 0.264 up   | pos |
| Prostaglandin-c2            | 335.22 | 775.12 | 0.32  | C05955 | 0.075 | -3.736 | 0.008 | 0.178 down | pos |
| Rosmarinic acid             | 360.13 | 149.73 | 7.27  | C01850 | 0.706 | -0.502 | 0.005 | 0.202 down | neg |
| S-Adenosylmethionine        | 398.13 | 486.86 | 10.53 | C00019 | 0.497 | -1.010 | 0.045 | 0.264 down | pos |
| Sinapoyl aldehyde           | 209.08 | 377.34 | 0.04  | C05610 | 0.342 | -1.549 | 0.005 | 0.178 down | pos |
| Stearidonic acid            | 277.22 | 841.89 | 3.32  | C16300 | 0.576 | -0.797 | 0.031 | 0.231 down | pos |
| Thromboxane B2              | 353.23 | 557.24 | 0.61  | C05963 | 2.401 | 1.264  | 0.005 | 0.178 up   | pos |

**Table S3.** Evaluation statistics list of sample sequencing clean data

| Sample | Read Number | Base Number(b) | GC Content | ≥Q30(%) |
|--------|-------------|----------------|------------|---------|
| CK1    | 25,394,501  | 7,586,653,728  | 44.95      | 94.45   |
| CK2    | 24,660,897  | 7,367,697,804  | 44.62      | 94.37   |
| CK3    | 22,069,180  | 6,595,223,742  | 45.03      | 93.99   |
| NT1    | 20,878,753  | 6,246,639,586  | 44.15      | 94.78   |
| NT2    | 24,130,381  | 7,203,395,870  | 44.60      | 93.96   |
| NT3    | 26,463,449  | 7,906,338,666  | 44.41      | 94.26   |
| Total  |             | 42.91Gb        |            |         |

Read Number: Total number of pair-end reads among clean data. Base Number: Total base number of clean Data. GC Content: G+C% Base Number. ≥Q30(%): The percentage of mass value of clean data is greater than or equal to 30.

**Table S4.** Annotation information of DEGs

| Databases    | COG   | GO    | KEGG  | KOG   | Pfam  | Swiss-Prot | NOG   | NR    | Total |
|--------------|-------|-------|-------|-------|-------|------------|-------|-------|-------|
| Gene         | 534   | 859   | 454   | 693   | 926   | 867        | 1038  | 1076  | 1113  |
| proportion/% | 47.98 | 77.18 | 40.79 | 62.26 | 83.20 | 77.90      | 93.26 | 96.68 | 100   |

TableS5 Correlation and regulation of DEGs to DAMs via KEGG pathways

**TableS5.1** Correlation and regulation of DEGs to DAMs via biosynthesis of unsaturated fatty acids

| Gene ID                  | Regulation | Metabolite           | Regulation |
|--------------------------|------------|----------------------|------------|
| F01_transcript_1640<br>2 | down       | Glyoxylic acid       | up         |
| F01_transcript_1640<br>2 | down       | 5,7-Dihydroxyflavone | down       |
| F01_transcript_5240<br>4 | down       | Glyoxylic acid       | up         |
| F01_transcript_5240<br>4 | down       | S-Adenosylmethionine | down       |
| F01_transcript_5240<br>4 | down       | Sinapoyl aldehyde    | down       |
| F01_transcript_5240<br>4 | down       | 5,7-Dihydroxyflavone | down       |
| F01_transcript_6441<br>1 | down       | Glyoxylic acid       | up         |
| F01_transcript_6441<br>1 | down       | S-Adenosylmethionine | down       |
| F01_transcript_6441<br>1 | down       | Sinapoyl aldehyde    | down       |
| F01_transcript_6441      | down       | 5,7-Dihydroxyflavone | down       |

|                     |      |                      |      |
|---------------------|------|----------------------|------|
| 1                   |      |                      |      |
| F01_transcript_8765 | down | Glyoxylic acid       | up   |
| F01_transcript_8765 | down | Sinapoyl aldehyde    | down |
| F01_transcript_8765 | down | 5,7-Dihydroxyflavone | down |
| F01_transcript_9835 | down | Glyoxylic acid       | up   |
| 4                   |      |                      |      |
| F01_transcript_9835 | down | Sinapoyl aldehyde    | down |
| 4                   |      |                      |      |
| F01_transcript_9835 | down | 5,7-Dihydroxyflavone | down |
| 4                   |      |                      |      |

F01\_transcript\_16402 : 3-ketoacyl-CoA thiolase 2, peroxisomal; F01\_transcript\_52404: 3-ketoacyl-CoA thiolase 2; F01\_transcript\_64411: Peroxisomal acyl-coenzyme A oxidase 1; F01\_transcript\_8765: Peroxisomal acyl-coenzyme A oxidase 1; F01\_transcript\_98354: 3-ketoacyl-CoA thiolase 2

**TableS5.2** Correlation and regulation of DEGs to DAMs via flavone and flavonol biosynthesis

| Gene ID             | Regulation | Metabolite            | Regulation |
|---------------------|------------|-----------------------|------------|
| F01_transcript_1371 | down       | S-Adenosylmethionine  | down       |
| 8                   |            |                       |            |
| F01_transcript_1371 | down       | Sinapoyl aldehyde     | down       |
| 8                   |            |                       |            |
| F01_transcript_1371 | down       | 5,7-Dihydroxyflavone  | down       |
| 8                   |            |                       |            |
| F01_transcript_1371 | down       | Kynurenic acid        | down       |
| 8                   |            |                       |            |
| F01_transcript_3621 | down       | Myristic acid         | down       |
| 9                   |            |                       |            |
| F01_transcript_3621 | down       | S-Adenosylmethionine  | down       |
| 9                   |            |                       |            |
| F01_transcript_3621 | down       | Sinapoyl aldehyde     | down       |
| 9                   |            |                       |            |
| F01_transcript_3621 | down       | 5,7-Dihydroxyflavone  | down       |
| 9                   |            |                       |            |
| F01_transcript_3621 | down       | Kynurenic acid        | down       |
| 9                   |            |                       |            |
| F01_transcript_6514 | down       | Glyoxylic acid        | up         |
| 6                   |            |                       |            |
| F01_transcript_6514 | down       | S-Adenosylmethionine  | down       |
| 6                   |            |                       |            |
| F01_transcript_6514 | down       | Sinapoyl aldehyde     | down       |
| 6                   |            |                       |            |
| F01_transcript_6514 | down       | 5,7-Dihydroxyflavone  | down       |
| 6                   |            |                       |            |
| F01_transcript_7650 | down       | Glyoxylic acid        | up         |
| 6                   |            |                       |            |
| F01_transcript_7650 | down       | S-Adenosylmethionine  | down       |
| 6                   |            |                       |            |
| F01_transcript_7650 | down       | Sinapoyl aldehyde     | down       |
| 6                   |            |                       |            |
| F01_transcript_7650 | down       | 5,7-Dihydroxyflavone  | down       |
| 6                   |            |                       |            |
| F01_transcript_7650 | down       | 3-Hydroxybenzoic acid | up         |
| 6                   |            |                       |            |
| F01_transcript_9375 | up         | 9,10-DHOME            | down       |
| 1                   |            |                       |            |

F01\_transcript\_13718: Flavonoid 3'-monooxygenase; F01\_transcript\_36219: Flavonoid 3'-monooxygenase; F01\_transcript\_65146: Flavonoid 3'-monooxygenase; F01\_transcript\_76506: Flavonoid 3'-monooxygenase; F01\_transcript\_93751: Flavonoid 3',5'-methyltransferase

**TableS5.3** Correlation and regulation of DEGs to DAMs via flavonoid biosynthesis

| Gene ID              | Regulation | Metabolite            | Regulation |
|----------------------|------------|-----------------------|------------|
| F01_transcript_13718 | down       | S-Adenosylmethionine  | down       |
| F01_transcript_13718 | down       | Sinapoyl aldehyde     | down       |
| F01_transcript_13718 | down       | 5,7-Dihydroxyflavone  | down       |
| F01_transcript_13718 | down       | Kynurenic acid        | down       |
| F01_transcript_36219 | down       | Myristic acid         | down       |
| F01_transcript_36219 | down       | S-Adenosylmethionine  | down       |
| F01_transcript_36219 | down       | Sinapoyl aldehyde     | down       |
| F01_transcript_36219 | down       | 5,7-Dihydroxyflavone  | down       |
| F01_transcript_36219 | down       | Kynurenic acid        | down       |
| F01_transcript_54233 | down       | Glyoxylic acid        | up         |
| F01_transcript_54233 | down       | S-Adenosylmethionine  | down       |
| F01_transcript_54233 | down       | Sinapoyl aldehyde     | down       |
| F01_transcript_54233 | down       | 5,7-Dihydroxyflavone  | down       |
| F01_transcript_65068 | down       | S-Adenosylmethionine  | down       |
| F01_transcript_65068 | down       | Sinapoyl aldehyde     | down       |
| F01_transcript_65068 | down       | 5,7-Dihydroxyflavone  | down       |
| F01_transcript_65146 | down       | Glyoxylic acid        | up         |
| F01_transcript_65146 | down       | S-Adenosylmethionine  | down       |
| F01_transcript_65146 | down       | Sinapoyl aldehyde     | down       |
| F01_transcript_65146 | down       | 5,7-Dihydroxyflavone  | down       |
| F01_transcript_76506 | down       | Glyoxylic acid        | up         |
| F01_transcript_76506 | down       | S-Adenosylmethionine  | down       |
| F01_transcript_76506 | down       | Sinapoyl aldehyde     | down       |
| F01_transcript_76506 | down       | 5,7-Dihydroxyflavone  | down       |
| F01_transcript_76506 | down       | 3-Hydroxybenzoic acid | up         |



|                     |      |                      |      |
|---------------------|------|----------------------|------|
| 6                   |      |                      |      |
| F01_transcript_8838 | down | Glyoxylic acid       | up   |
| 3                   |      |                      |      |
| F01_transcript_8838 | down | S-Adenosylmethionine | down |
| 3                   |      |                      |      |
| F01_transcript_8838 | down | Sinapoyl aldehyde    | down |
| 3                   |      |                      |      |
| F01_transcript_8838 | down | 5,7-Dihydroxyflavone | down |
| 3                   |      |                      |      |

F01\_transcript\_13718: Flavonoid 3'-monooxygenase; F01\_transcript\_36219: Flavonoid 3'-monooxygenase; F01\_transcript\_54233: Caffeoyl-CoA O-methyltransferase; F01\_transcript\_65068: Chalcone--flavonone isomerase; F01\_transcript\_65146: Flavonoid 3'-monooxygenase; F01\_transcript\_76506: Flavonoid 3'-monooxygenase; F01\_transcript\_88383: Caffeoyl-CoA O-methyltransferase

**TableS5.4** Correlation and regulation of DEGs to DAMs via phenylalanine metabolism

| Gene ID              | Regulation | Metabolite                         | Regulation |
|----------------------|------------|------------------------------------|------------|
| F01_transcript_33286 | down       | Glyoxylic acid                     | up         |
| F01_transcript_33286 | down       | 5,7-Dihydroxyflavone               | down       |
| F01_transcript_88383 | down       | Glyoxylic acid                     | up         |
| F01_transcript_88383 | down       | S-Adenosylmethionine               | down       |
| F01_transcript_88383 | down       | Sinapoyl aldehyde                  | down       |
| F01_transcript_88383 | down       | 5,7-Dihydroxyflavone               | down       |
| F01_transcript_50638 | down       | Glyoxylic acid                     | up         |
| F01_transcript_50638 | down       | 9(S)-HPOT                          | down       |
| F01_transcript_50638 | down       | Kaempferide                        | up         |
| F01_transcript_50638 | down       | 3-Methylindole                     | down       |
| F01_transcript_50638 | down       | (E)-3-(4-Hydroxyphenyl)-2-propenal | up         |
| F01_transcript_50638 | down       | Sinapoyl aldehyde                  | down       |
| F01_transcript_50638 | down       | 3-Hydroxybenzoic acid              | up         |
| F01_transcript_13137 | down       | Glyoxylic acid                     | up         |
| F01_transcript_13137 | down       | 5,7-Dihydroxyflavone               | down       |
| F01_transcript_49410 | up         | beta-Sitosterol                    | up         |
| F01_transcript_49410 | up         | (E)-3-(4-Hydroxyphenyl)-2-propenal | up         |
| F01_transcript_49410 | up         | Sinapoyl aldehyde                  | down       |
| F01_transcript_49410 | up         | 3-Hydroxybenzoic acid              | up         |
| F01_transcript_54233 | down       | Glyoxylic acid                     | up         |
| F01_transcript_54233 | down       | S-Adenosylmethionine               | down       |
| F01_transcript_54233 | down       | Sinapoyl aldehyde                  | down       |
| F01_transcript_54233 | down       | 5,7-Dihydroxyflavone               | down       |

F01\_transcript\_33286: 4-coumarate--CoA ligase 2; F01\_transcript\_88383: Caffeoyl-CoA O-methyltransferase ; F01\_transcript\_50638: aminotransferase TAT2; F01\_transcript\_13137: Primary amine oxidase; F01\_transcript\_49410: Aspartate aminotransferase; F01\_transcript\_54233: Caffeoyl-CoA O-methyltransferase

**TableS5.5** Correlation and regulation of DEGs to DAMs via phenylpropanoid biosynthesis

| Gene ID              | Regulation | Metabolite           | Regulation |
|----------------------|------------|----------------------|------------|
| F01_transcript_45042 | down       | Glyoxylic acid       | up         |
| F01_transcript_45042 | down       | Sinapoyl aldehyde    | down       |
| F01_transcript_45042 | down       | 5,7-Dihydroxyflavone | down       |
| F01_transcript_45952 | down       | Glyoxylic acid       | up         |
| F01_transcript_45952 | down       | 5,7-Dihydroxyflavone | down       |
| F01_transcript_48883 | down       | Glyoxylic acid       | up         |
| F01_transcript_48883 | down       | S-Adenosylmethionine | down       |

|                      |      |                      |      |
|----------------------|------|----------------------|------|
| F01_transcript_48883 | down | Sinapoyl aldehyde    | down |
| F01_transcript_48883 | down | 5,7-Dihydroxyflavone | down |
| F01_transcript_57503 | down | Glyoxylic acid       | up   |
| F01_transcript_57503 | down | Sinapoyl aldehyde    | down |
| F01_transcript_57503 | down | 5,7-Dihydroxyflavone | down |
| F01_transcript_79209 | down | Glyoxylic acid       | up   |
| F01_transcript_79209 | down | Sinapoyl aldehyde    | down |
| F01_transcript_79209 | down | 5,7-Dihydroxyflavone | down |
| F01_transcript_83451 | down | Glyoxylic acid       | up   |
| F01_transcript_83451 | down | Sinapoyl aldehyde    | down |
| F01_transcript_83451 | down | 5,7-Dihydroxyflavone | down |
| F01_transcript_86382 | down | Glyoxylic acid       | up   |
| F01_transcript_86382 | down | 5,7-Dihydroxyflavone | down |
| F01_transcript_88550 | down | Glyoxylic acid       | up   |
| F01_transcript_88550 | down | 5,7-Dihydroxyflavone | down |
| F01_transcript_54233 | down | Glyoxylic acid       | up   |
| F01_transcript_54233 | down | S-Adenosylmethionine | down |
| F01_transcript_54233 | down | Sinapoyl aldehyde    | down |
| F01_transcript_54233 | down | 5,7-Dihydroxyflavone | down |
| F01_transcript_88383 | down | Glyoxylic acid       | up   |
| F01_transcript_88383 | down | S-Adenosylmethionine | down |
| F01_transcript_88383 | down | Sinapoyl aldehyde    | down |
| F01_transcript_88383 | down | 5,7-Dihydroxyflavone | down |
| F01_transcript_14367 | up   | Glyoxylic acid       | up   |
| F01_transcript_14367 | up   | Kaempferide          | up   |
| F01_transcript_14367 | up   | Lipoxin A4           | down |
| F01_transcript_14367 | up   | Rosmarinic acid      | down |
| F01_transcript_57187 | down | Glyoxylic acid       | up   |
| F01_transcript_57187 | down | Sinapoyl aldehyde    | down |
| F01_transcript_57187 | down | 5,7-Dihydroxyflavone | down |
| F01_transcript_94508 | down | Glyoxylic acid       | up   |
| F01_transcript_94508 | down | 5,7-Dihydroxyflavone | down |
| F01_transcript_33286 | down | Glyoxylic acid       | up   |
| F01_transcript_33286 | down | 5,7-Dihydroxyflavone | down |

F01\_transcript\_45042: Raucaffricine-O-beta-D-glucosidase; F01\_transcript\_45952: Raucaffricine-O-beta-D-glucosidase; F01\_transcript\_48883: Raucaffricine-O-beta-D-glucosidase; F01\_transcript\_57503: Raucaffricine-O-beta-D-glucosidase; F01\_transcript\_79209: Raucaffricine-O-beta-D-glucosidase; F01\_transcript\_83451: Raucaffricine-O-beta-D-glucosidase; F01\_transcript\_86382: Raucaffricine-O-beta-D-glucosidase; F01\_transcript\_88550: Raucaffricine-O-beta-D-glucosidase; F01\_transcript\_54233: Caffeoyl-CoA O-methyltransferase; F01\_transcript\_88383: Caffeoyl-CoA O-methyltransferase; F01\_transcript\_14367: Beta-glucosidase 1; F01\_transcript\_57187: Beta-glucosidase 12; F01\_transcript\_94508: Peroxidase 21; F01\_transcript\_33286: 4-coumarate--CoA ligase 2

**TableS5.6** Correlation and regulation of DEGs to DAMs via Cysteine and methionine metabolism

| Gene ID              | Regulation | Metabolite            | Regulation |
|----------------------|------------|-----------------------|------------|
| F01_transcript_92037 | up         | beta-Sitosterol       | up         |
| F01_transcript_92037 | up         | S-Adenosylmethionine  | down       |
| F01_transcript_92037 | up         | Sinapoyl aldehyde     | down       |
| F01_transcript_92037 | up         | 3-Hydroxybenzoic acid | up         |
| F01_transcript_66132 | up         | beta-Sitosterol       | up         |
| F01_transcript_66132 | up         | S-Adenosylmethionine  | down       |
| F01_transcript_66132 | up         | Sinapoyl aldehyde     | down       |
| F01_transcript_66132 | up         | 5,7-Dihydroxyflavone  | down       |
| F01_transcript_66132 | up         | 3-Hydroxybenzoic acid | up         |

|                      |      |                                    |      |
|----------------------|------|------------------------------------|------|
| F01_transcript_49410 | up   | beta-Sitosterol                    | up   |
| F01_transcript_49410 | up   | (E)-3-(4-Hydroxyphenyl)-2-propenal | up   |
| F01_transcript_49410 | up   | Sinapoyl aldehyde                  | down |
| F01_transcript_49410 | up   | 3-Hydroxybenzoic acid              | up   |
| F01_transcript_3160  | down | Glyoxylic acid                     | up   |
| F01_transcript_3160  | down | Sinapoyl aldehyde                  | down |
| F01_transcript_3160  | down | 5,7-Dihydroxyflavone               | down |
| F01_transcript_65625 | down | Glyoxylic acid                     | up   |
| F01_transcript_65625 | down | S-Adenosylmethionine               | down |
| F01_transcript_65625 | down | Sinapoyl aldehyde                  | down |
| F01_transcript_65625 | down | 5,7-Dihydroxyflavone               | down |
| F01_transcript_14387 | down | Glyoxylic acid                     | up   |
| F01_transcript_14387 | down | 5,7-Dihydroxyflavone               | down |
| F01_transcript_50638 | down | Glyoxylic acid                     | up   |
| F01_transcript_50638 | down | Kaempferide                        | up   |
| F01_transcript_50638 | down | 3-Methylindole                     | down |
| F01_transcript_50638 | down | 9(S)-HPOT                          | down |
| F01_transcript_50638 | down | (E)-3-(4-Hydroxyphenyl)-2-propenal | up   |
| F01_transcript_50638 | down | Sinapoyl aldehyde                  | down |
| F01_transcript_50638 | down | 3-Hydroxybenzoic acid              | up   |

F01\_transcript\_92037: DNA (cytosine-5)-methyltransferase CMT2, F01\_transcript\_66132: Bifunctional L-3-cyanoalanine synthase/cysteine synthase D2, F01\_transcript\_49410: Aspartate aminotransferase, F01\_transcript\_3160: Homoserine dehydrogenase, F01\_transcript\_65625: 5-methyltetrahydropteroyltriglutamate--homocysteine methyltransferase, F01\_transcript\_14387: S-adenosylmethionine decarboxylase beta chain, F01\_transcript\_50638: aminotransferase TAT2.

**TableS5.7** Correlation and regulation of DEGs to DAMs via Galactose metabolism

| Gene ID              | Regulation | Metabolite            | Regulation |
|----------------------|------------|-----------------------|------------|
| F01_transcript_16765 | down       | Glyoxylic acid        | up         |
| F01_transcript_16765 | down       | 5,7-Dihydroxyflavone  | down       |
| F01_transcript_5582  | down       | Glyoxylic acid        | up         |
| F01_transcript_5582  | down       | Kaempferide           | up         |
| F01_transcript_5582  | down       | Prostaglandin-c2      | down       |
| F01_transcript_5582  | down       | 3-Hydroxybenzoic acid | up         |
| F01_transcript_6840  | down       | Glyoxylic acid        | up         |
| F01_transcript_6840  | down       | S-Adenosylmethionine  | down       |
| F01_transcript_6840  | down       | Sinapoyl aldehyde     | down       |
| F01_transcript_6840  | down       | 5,7-Dihydroxyflavone  | down       |
| F01_transcript_97079 | up         | S-Adenosylmethionine  | down       |
| F01_transcript_97134 | down       | Glyoxylic acid        | up         |
| F01_transcript_97134 | down       | S-Adenosylmethionine  | down       |
| F01_transcript_97134 | down       | Sinapoyl aldehyde     | down       |
| F01_transcript_97134 | down       | 5,7-Dihydroxyflavone  | down       |

F01\_transcript\_16765: Galactinol synthase 1; F01\_transcript\_5582: Galactinol--sucrose galactosyltransferase; F01\_transcript\_6840: Galactinol--sucrose galactosyltransferase; F01\_transcript\_97079: Alpha-galactosidase; F01\_transcript\_97134: Galactinol--sucrose galactosyltransferase 6

**TableS5.8** Correlation and regulation of DEGs to DAMs via Glyoxylate and dicarboxylate metabolism

| Gene ID              | Regulation | Metabolite           | Regulation |
|----------------------|------------|----------------------|------------|
| F01_transcript_13584 | down       | Glyoxylic acid       | up         |
| F01_transcript_13584 | down       | S-Adenosylmethionine | down       |
| F01_transcript_13584 | down       | Sinapoyl aldehyde    | down       |
| F01_transcript_13584 | down       | 5,7-Dihydroxyflavone | down       |

|                      |      |                                    |      |
|----------------------|------|------------------------------------|------|
| F01_transcript_13967 | down | Myristic acid                      | down |
| F01_transcript_13967 | down | 9(S)-HPOT                          | down |
| F01_transcript_13967 | down | 3-Methylindole                     | down |
| F01_transcript_13967 | down | (E)-3-(4-Hydroxyphenyl)-2-propenal | up   |
| F01_transcript_13967 | down | 3-Hydroxybenzoic acid              | up   |
| F01_transcript_14891 | down | Glyoxylic acid                     | up   |
| F01_transcript_14891 | down | S-Adenosylmethionine               | down |
| F01_transcript_14891 | down | Sinapoyl aldehyde                  | down |
| F01_transcript_14891 | down | 5,7-Dihydroxyflavone               | down |
| F01_transcript_4862  | down | Glyoxylic acid                     | up   |
| F01_transcript_4862  | down | 3-Hydroxybenzoic acid              | up   |
| F01_transcript_57595 | down | S-Adenosylmethionine               | down |
| F01_transcript_57595 | down | Sinapoyl aldehyde                  | down |
| F01_transcript_57595 | down | 5,7-Dihydroxyflavone               | down |
| F01_transcript_57595 | down | Naringin                           | down |
| F01_transcript_57595 | down | Kynurenic acid                     | down |

F01\_transcript\_13584: Serine hydroxymethyltransferase 2; F01\_transcript\_13967: Dihydrolipoyl dehydrogenase 1; F01\_transcript\_14891: Citrate synthase; F01\_transcript\_4862: Glutamine synthetase cytosolic isozyme 1; F01\_transcript\_57595: Aconitate hydratase

**TableS5.9** Correlation and regulation of DEGs to DAMs via Glycine, serine and threonine metabolism

| Gene ID              | Regulation | Metabolite                         | Regulation |
|----------------------|------------|------------------------------------|------------|
| F01_transcript_13137 | down       | Glyoxylic acid                     | up         |
| F01_transcript_13137 | down       | 5,7-Dihydroxyflavone               | down       |
| F01_transcript_13584 | down       | Glyoxylic acid                     | up         |
| F01_transcript_13584 | down       | S-Adenosylmethionine               | down       |
| F01_transcript_13584 | down       | Sinapoyl aldehyde                  | down       |
| F01_transcript_13584 | down       | 5,7-Dihydroxyflavone               | down       |
| F01_transcript_13967 | down       | Myristic acid                      | down       |
| F01_transcript_13967 | down       | 9(S)-HPOT                          | down       |
| F01_transcript_13967 | down       | 3-Methylindole                     | down       |
| F01_transcript_13967 | down       | (E)-3-(4-Hydroxyphenyl)-2-propenal | up         |
| F01_transcript_13967 | down       | 3-Hydroxybenzoic acid              | up         |
| F01_transcript_3160  | down       | Glyoxylic acid                     | up         |
| F01_transcript_3160  | down       | Sinapoyl aldehyde                  | down       |
| F01_transcript_3160  | down       | 5,7-Dihydroxyflavone               | down       |
| F01_transcript_77388 | down       | Glyoxylic acid                     | up         |
| F01_transcript_77388 | down       | Sinapoyl aldehyde                  | down       |
| F01_transcript_77388 | down       | 5,7-Dihydroxyflavone               | down       |

F01\_transcript\_13137: Primary amine oxidase; F01\_transcript\_13584: Serine hydroxymethyltransferase 2; F01\_transcript\_13967: Dihydrolipoyl dehydrogenase 1; F01\_transcript\_3160: Homoserine dehydrogenase; F01\_transcript\_77388: D-3-phosphoglycerate dehydrogenase 2

**TableS5.10** Correlation and regulation of DEGs to DAMs via Steroid biosynthesis

| Gene ID              | Regulation | Metabolite            | Regulation |
|----------------------|------------|-----------------------|------------|
| F01_transcript_18023 | up         | beta-Sitosterol       | up         |
| F01_transcript_53548 | down       | Glyoxylic acid        | up         |
| F01_transcript_53548 | down       | 5,7-Dihydroxyflavone  | down       |
| F01_transcript_53548 | down       | 3-Hydroxybenzoic acid | up         |

F01\_transcript\_18023: Triacylglycerol lipase 1; F01\_transcript\_53548: Squalene monooxygenase

**TableS5.11** Correlation and regulation of DEGs to DAMs via alpha-Linolenic acid metabolism

| Gene ID              | Regulation | Metabolite           | Regulation |
|----------------------|------------|----------------------|------------|
| F01_transcript_16402 | down       | Glyoxylic acid       | up         |
| F01_transcript_16402 | down       | 5,7-Dihydroxyflavone | down       |
| F01_transcript_52404 | down       | Glyoxylic acid       | up         |
| F01_transcript_52404 | down       | S-Adenosylmethionine | down       |
| F01_transcript_52404 | down       | Sinapoyl aldehyde    | down       |
| F01_transcript_52404 | down       | 5,7-Dihydroxyflavone | down       |
| F01_transcript_59138 | down       | Glyoxylic acid       | up         |
| F01_transcript_59138 | down       | 5,7-Dihydroxyflavone | down       |
| F01_transcript_64411 | down       | Glyoxylic acid       | up         |
| F01_transcript_64411 | down       | S-Adenosylmethionine | down       |
| F01_transcript_64411 | down       | Sinapoyl aldehyde    | down       |
| F01_transcript_64411 | down       | 5,7-Dihydroxyflavone | down       |
| F01_transcript_8765  | down       | Glyoxylic acid       | up         |
| F01_transcript_8765  | down       | Sinapoyl aldehyde    | down       |
| F01_transcript_8765  | down       | 5,7-Dihydroxyflavone | down       |
| F01_transcript_98354 | down       | Glyoxylic acid       | up         |
| F01_transcript_98354 | down       | Sinapoyl aldehyde    | down       |
| F01_transcript_98354 | down       | 5,7-Dihydroxyflavone | down       |

F01\_transcript\_16402: 3-ketoacyl-CoA thiolase 2; F01\_transcript\_52404: 3-ketoacyl-CoA thiolase 2;

F01\_transcript\_59138: Allene oxide cyclase 3; F01\_transcript\_64411: Peroxisomal acyl-coenzyme A oxidase 1;

F01\_transcript\_8765: Peroxisomal acyl-coenzyme A oxidase 1; F01\_transcript\_98354: 3-ketoacyl-CoA thiolase 2

**TableS5.12** Correlation and regulation of DEGs to DAMs via Arginine and proline metabolism

| Gene ID              | Regulation | Metabolite                         | Regulation |
|----------------------|------------|------------------------------------|------------|
| F01_transcript_14387 | down       | Glyoxylic acid                     | up         |
| F01_transcript_14387 | down       | 5,7-Dihydroxyflavone               | down       |
| F01_transcript_49410 | up         | beta-Sitosterol                    | up         |
| F01_transcript_49410 | up         | (E)-3-(4-Hydroxyphenyl)-2-propenal | up         |
| F01_transcript_49410 | up         | Sinapoyl aldehyde                  | down       |
| F01_transcript_49410 | up         | 3-Hydroxybenzoic acid              | up         |

F01\_transcript\_14387: S-adenosylmethionine decarboxylase beta chain; F01\_transcript\_49410: Aspartate aminotransferase

**TableS6.** Correlation and regulation of DEGs belonging to transcription factors(TFs) to DAMs

| TF ID                | Regulation | Metabolite                         | Regulation |
|----------------------|------------|------------------------------------|------------|
| F01_transcript_14491 | up         | S-Adenosylmethionine               | down       |
| F01_transcript_14491 | up         | Sinapoyl aldehyde                  | down       |
| F01_transcript_14819 | up         | beta-Sitosterol                    | up         |
| F01_transcript_14819 | up         | S-Adenosylmethionine               | down       |
| F01_transcript_14819 | up         | (E)-3-(4-Hydroxyphenyl)-2-propenal | up         |
| F01_transcript_14819 | up         | Sinapoyl aldehyde                  | down       |
| F01_transcript_14819 | up         | 3-Hydroxybenzoic acid              | up         |
| F01_transcript_16804 | up         | beta-Sitosterol                    | up         |
| F01_transcript_16804 | up         | S-Adenosylmethionine               | down       |
| F01_transcript_16804 | up         | 3-Hydroxybenzoic acid              | up         |
| F01_transcript_17041 | up         | beta-Sitosterol                    | up         |
| F01_transcript_17041 | up         | S-Adenosylmethionine               | down       |
| F01_transcript_17041 | up         | 3-Hydroxybenzoic acid              | up         |
| F01_transcript_18056 | down       | Glyoxylic acid                     | up         |
| F01_transcript_18056 | down       | S-Adenosylmethionine               | down       |
| F01_transcript_18056 | down       | Sinapoyl aldehyde                  | down       |
| F01_transcript_18056 | down       | 5,7-Dihydroxyflavone               | down       |
| F01_transcript_24248 | down       | S-Adenosylmethionine               | down       |
| F01_transcript_24248 | down       | Sinapoyl aldehyde                  | down       |
| F01_transcript_24248 | down       | 5,7-Dihydroxyflavone               | down       |
| F01_transcript_24692 | down       | Glyoxylic acid                     | up         |
| F01_transcript_24692 | down       | S-Adenosylmethionine               | down       |
| F01_transcript_24692 | down       | Sinapoyl aldehyde                  | down       |
| F01_transcript_24692 | down       | 5,7-Dihydroxyflavone               | down       |
| F01_transcript_25025 | down       | Glyoxylic acid                     | up         |
| F01_transcript_25025 | down       | Sinapoyl aldehyde                  | down       |
| F01_transcript_25025 | down       | 5,7-Dihydroxyflavone               | down       |
| F01_transcript_31742 | up         | beta-Sitosterol                    | up         |
| F01_transcript_33244 | up         | Glyoxylic acid                     | up         |
| F01_transcript_33244 | up         | 9(S)-HPOT                          | down       |
| F01_transcript_33244 | up         | Kaempferide                        | up         |
| F01_transcript_33244 | up         | 3-Methylindole                     | down       |
| F01_transcript_33244 | up         | Stearidonic acid                   | down       |
| F01_transcript_33244 | up         | Prostaglandin-c2                   | down       |
| F01_transcript_33244 | up         | 3-Hydroxybenzoic acid              | up         |
| F01_transcript_33244 | up         | m-Coumaric acid                    | down       |
| F01_transcript_34832 | down       | Glyoxylic acid                     | up         |
| F01_transcript_34832 | down       | 5,7-Dihydroxyflavone               | down       |
| F01_transcript_34879 | up         | 9(S)-HPOT                          | down       |
| F01_transcript_34879 | up         | Kaempferide                        | up         |
| F01_transcript_34879 | up         | 3-Methylindole                     | down       |
| F01_transcript_34879 | up         | beta-Sitosterol                    | up         |
| F01_transcript_34879 | up         | (E)-3-(4-Hydroxyphenyl)-2-propenal | up         |
| F01_transcript_34879 | up         | Rosmarinic acid                    | down       |
| F01_transcript_34879 | up         | 3-Hydroxybenzoic acid              | up         |
| F01_transcript_42053 | up         | beta-Sitosterol                    | up         |
| F01_transcript_42053 | up         | S-Adenosylmethionine               | down       |
| F01_transcript_42053 | up         | Naringin                           | down       |
| F01_transcript_43678 | up         | beta-Sitosterol                    | up         |
| F01_transcript_43678 | up         | 3-Hydroxybenzoic acid              | up         |
| F01_transcript_48038 | down       | Glyoxylic acid                     | up         |
| F01_transcript_48038 | down       | Sinapoyl aldehyde                  | down       |
| F01_transcript_48038 | down       | 5,7-Dihydroxyflavone               | down       |
| F01_transcript_48038 | down       | 3-Hydroxybenzoic acid              | up         |
| F01_transcript_48636 | down       | Glyoxylic acid                     | up         |

|                      |      |                                    |      |
|----------------------|------|------------------------------------|------|
| F01_transcript_48636 | down | Kaempferide                        | up   |
| F01_transcript_48636 | down | 3-Hydroxybenzoic acid              | up   |
| F01_transcript_50082 | down | Glyoxylic acid                     | up   |
| F01_transcript_50082 | down | Sinapoyl aldehyde                  | down |
| F01_transcript_50082 | down | 5,7-Dihydroxyflavone               | down |
| F01_transcript_54031 | up   | beta-Sitosterol                    | up   |
| F01_transcript_54031 | up   | Naringin                           | down |
| F01_transcript_57597 | down | Glyoxylic acid                     | up   |
| F01_transcript_57597 | down | 3-Hydroxybenzoic acid              | up   |
| F01_transcript_58757 | up   | beta-Sitosterol                    | up   |
| F01_transcript_58757 | up   | S-Adenosylmethionine               | down |
| F01_transcript_58757 | up   | (E)-3-(4-Hydroxyphenyl)-2-propenal | up   |
| F01_transcript_58757 | up   | Sinapoyl aldehyde                  | down |
| F01_transcript_65141 | up   | Kaempferide                        | up   |
| F01_transcript_65141 | up   | beta-Sitosterol                    | up   |
| F01_transcript_65141 | up   | Rosmarinic acid                    | down |
| F01_transcript_65141 | up   | 3-Hydroxybenzoic acid              | up   |
| F01_transcript_67070 | up   | Glyoxylic acid                     | up   |
| F01_transcript_67070 | up   | Sinapoyl aldehyde                  | down |
| F01_transcript_67070 | up   | 5,7-Dihydroxyflavone               | down |
| F01_transcript_68607 | up   | beta-Sitosterol                    | up   |
| F01_transcript_70090 | up   | 9,10-DHOME                         | down |
| F01_transcript_70090 | up   | beta-Sitosterol                    | up   |
| F01_transcript_79126 | down | Myristic acid                      | down |
| F01_transcript_79126 | down | S-Adenosylmethionine               | down |
| F01_transcript_79126 | down | (E)-3-(4-Hydroxyphenyl)-2-propenal | up   |
| F01_transcript_79126 | down | Sinapoyl aldehyde                  | down |
| F01_transcript_79126 | down | Kynurenic acid                     | down |
| F01_transcript_81509 | up   | beta-Sitosterol                    | up   |
| F01_transcript_81509 | up   | 9,10-DHOME                         | down |
| F01_transcript_88073 | down | Glyoxylic acid                     | up   |
| F01_transcript_88073 | down | Sinapoyl aldehyde                  | down |
| F01_transcript_88073 | down | 5,7-Dihydroxyflavone               | down |
| F01_transcript_88985 | up   | Glyoxylic acid                     | up   |
| F01_transcript_88985 | up   | Kaempferide                        | up   |
| F01_transcript_88985 | up   | 5,7-Dihydroxyflavone               | down |
| F01_transcript_88985 | up   | 3-Hydroxybenzoic acid              | up   |
| F01_transcript_9341  | up   | beta-Sitosterol                    | up   |
| F01_transcript_9341  | up   | S-Adenosylmethionine               | down |
| F01_transcript_9341  | up   | 5,7-Dihydroxyflavone               | down |
| F01_transcript_9341  | up   | 3-Hydroxybenzoic acid              | up   |

F01\_transcript\_14491:*ASIL2*; F01\_transcript\_14819:*ASIL2*; F01\_transcript\_16804:*BZR1*;  
F01\_transcript\_17041:*BZR1*; F01\_transcript\_18056:*ASI*; F01\_transcript\_24248: *WRKY50*;  
F01\_transcript\_24692:*WRKY50*; F01\_transcript\_25025:*PTI5*; F01\_transcript\_31742:*PMAI*;  
F01\_transcript\_33244:*WER*; F01\_transcript\_34832: *RAP2-7*; F01\_transcript\_34879:*BHLH130*;  
F01\_transcript\_42053:*EIN3*; F01\_transcript\_43678: unknow; F01\_transcript\_48038:*WRKY70*;  
F01\_transcript\_48636: *SOC1*; F01\_transcript\_50082:*HY5*; F01\_transcript\_54031:*BZR1*;  
F01\_transcript\_57597:*MYB*; F01\_transcript\_58757:*LHY*; F01\_transcript\_65141:*LUX*;  
F01\_transcript\_67070: *BHLH130*; F01\_transcript\_68607: *MYB1R1*;  
F01\_transcript\_70090:*ERF038*; F01\_transcript\_79126:*BZIP43*; F01\_transcript\_81509:*APL*;  
F01\_transcript\_88073:*EIN3*; F01\_transcript\_88985:*BAM7*; F01\_transcript\_9341:*EIN3*

**Table S7.** List of RT-qPCR primers

| ID                   | Sequence(5'-3')                                   | Expected amplicon size<br>(bp) |
|----------------------|---------------------------------------------------|--------------------------------|
| F01_transcript_42053 | F:ACCATACACCACCTACATTCG<br>R: GCCCTCCAACACTATTCCT | 158                            |

|                      |                                                          |     |
|----------------------|----------------------------------------------------------|-----|
| F01_transcript_9341  | F: ACGATCTCATGTCGCTCTA<br>R: GCAGTGTTGGCGTTGTA           | 190 |
| F01_transcript_60137 | F: TACCTCTGAACCCGTTGC<br>R: ACAGCCCTTGAATCTCCA           | 105 |
| F01_transcript_40403 | F: AACGAGCAGAGTTGTCCCT<br>R: AGCCCTTGAATCTCCACAG         | 130 |
| F01_transcript_54031 | F: GCTGCTCCCACTTCACCTA<br>R: ACCTTCCCATGCCTTCACT         | 156 |
| F01_transcript_17041 | F: ACACTGCGACAACAACGA<br>R: GTAAGAAGGTGCGGGACT           | 199 |
| F01_transcript_33286 | F: TCAAAGGGTTTCAAGTGCCA<br>R: CCTCACCAGCATCCTCATCT       | 108 |
| F01_transcript_35805 | F: CACAAGGGCATGGCAAGAG<br>R: GCAATGGCGGAAGTACGAG         | 111 |
| F01_transcript_46007 | F: TTATCGTCGTCGGTCTCG<br>R: AGGACTGCCAGAATGAACG          | 183 |
| F01_transcript_54233 | F: TGGCTACGACAACACCC<br>R: CGGCACAGAGTAATCCC             | 174 |
| F01_transcript_14367 | F: GGAAGGCATGGCCGATAAG<br>R: AGGCATTGTTTGGCTCACG         | 86  |
| F01_transcript_63376 | F: GTGGTGGAACGATCTCCG<br>R: TGTAGCCGCCATAAGGGT           | 170 |
| F01_transcript_23979 | F: CTGGACGAGAATCTGCTTT<br>R: GCTGCGGTGGTAATGTTT          | 150 |
| F01_transcript_32117 | F: AAGGCTGCTAAAGGGAGGA<br>R: CAGAAGGGCACATGAAAGA         | 139 |
| F01_transcript_66084 | F: GTCTTTCATGTGCCCTTCG<br>R: ATCGCCACCATCATCTACC         | 154 |
| <i>TIP41</i>         | F: TGGCTCAGAGTTGATGGAGTGCT<br>R: CTCTCCAGCAGCTTTCTCGGAGA | 74  |

---
